# Supplementary material for: Effective extraction and determination of 9 β-lactams in water and milk samples by a novel magnetic covalent organic framework combined with UPLC-MS/MS
Source: Royal Society of Chemistry journal article supplement (doi:10.1039/d5ra09307d), 2026-04-08
Supplement: d5ra09307d1.pdf [file d5ra09307d1.pdf]

Supplementary information

**Effective extraction and determination of 9  $\beta$ -lactams in water  
and milk samples by a novel magnetic covalent organic  
framework combined with UPLC-MS/MS**

Lu Li,<sup>ab</sup> Na Li,<sup>a</sup> Wendan Niu,<sup>ab</sup> Aijing Guo,<sup>ab</sup> Ling Ma,<sup>\*ab</sup> Wei Zhao,<sup>\*a</sup> Yawei Zhang<sup>\*a</sup> and Ke  
Wang<sup>\*ab</sup>

*a. Shijiazhuang Center for Disease Control and Prevention, Shijiazhuang 050011, China*

*b. Shijiazhuang Technology Innovation Center for Chemical Poison Detection and Risk Early  
Warning, Shijiazhuang 050011, China*

*\* Corresponding authors at: Shijiazhuang Center for Disease Control and Prevention,  
Shijiazhuang, China; Shijiazhuang Technology Innovation Center for Chemical Poison  
Detection and Risk Early Warning, Shijiazhuang, China.*

*E-mail: mamalin001@163.com, 13933887009@139.com, 2211291167@qq.com,*

*wkecdc@163.com.*

## Contents

|                                                                                                                            |    |
|----------------------------------------------------------------------------------------------------------------------------|----|
| <b>Fig. S1</b> Total ion chromatograms of 9 $\beta$ -LAs .....                                                             | S1 |
| <b>Table S1</b> The information of 9 $\beta$ -LAs standard substances.....                                                 | S2 |
| <b>Table S2</b> Mass spectrometry conditions of 9 $\beta$ -LAs.....                                                        | S3 |
| <b>Table S3</b> The spiked recoveries and RSDs of 9 $\beta$ -LAs in the water and milk samples (n=5) .....                 | S4 |
| <b>Table S4</b> Adsorption of different types of antibiotics with $\text{Fe}_3\text{O}_4@\text{SiO}_2@\text{Ap-COF}$ ..... | S5 |

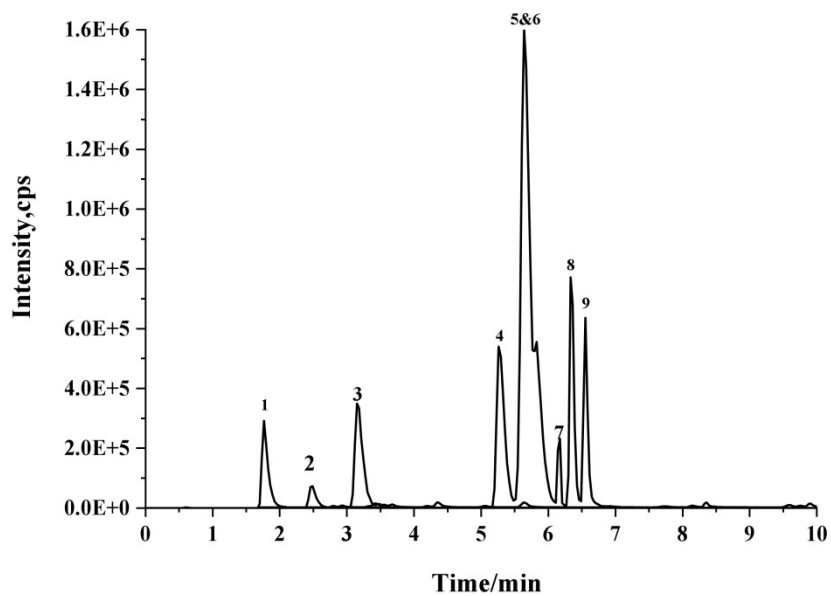

**Fig. S1** Total ion chromatograms of 9  $\beta$ -LAs. 1. CRA, 2. CFP, 3. EFT, 4. CPD, 5. CETP, 6. DIC, 7. CLO, 8. OXA, 9. FLU.

**Table S1** The information of 9  $\beta$ -LAs standard substances

| $\beta$ -LAs                    | Abbreviation | CAS         | Molecular formula                                                                 | Molecular mass | Purity (%) |
|---------------------------------|--------------|-------------|-----------------------------------------------------------------------------------|----------------|------------|
| Cefpiramide acid                | CRA          | 70797-11-4  | C <sub>25</sub> H <sub>24</sub> N <sub>8</sub> O <sub>7</sub> S <sub>2</sub>      | 612.64         | 98.0       |
| Cefoperazone                    | CFP          | 62893-19-0  | C <sub>25</sub> H <sub>27</sub> N <sub>9</sub> O <sub>8</sub> S <sub>2</sub>      | 645.67         | 95.0       |
| Ceftiofur                       | EFT          | 80370-57-6  | C <sub>19</sub> H <sub>17</sub> N <sub>5</sub> O <sub>7</sub> S <sub>3</sub>      | 523.56         | 97.0       |
| Cefpodoxime proxetil            | CPD          | 87239-81-4  | C <sub>21</sub> H <sub>27</sub> N <sub>5</sub> O <sub>9</sub> S <sub>2</sub>      | 557.6          | 99.7       |
| Cefetamet pivoxil hydrochloride | CETP         | 111696-23-2 | C <sub>20</sub> H <sub>26</sub> ClN <sub>5</sub> O <sub>7</sub> S <sub>2</sub>    | 548.03         | 70.2       |
| Dicloxacillin sodium            | DIC          | 13412-64-1  | C <sub>19</sub> H <sub>20</sub> Cl <sub>2</sub> N <sub>3</sub> NaO <sub>6</sub> S | 412.33         | 98.0       |
| Cloxacillin                     | CLO          | 61-72-3     | C <sub>19</sub> H <sub>18</sub> ClN <sub>3</sub> O <sub>5</sub> S                 | 435.88         | 93.8       |
| Oxacillin sodium                | OXA          | 1173-88-2   | C <sub>19</sub> H <sub>18</sub> N <sub>3</sub> NaO <sub>5</sub> S                 | 423.42         | 95.1       |
| Flucloxacillin                  | FLU          | 5250-39-5   | C <sub>19</sub> H <sub>17</sub> ClFN <sub>3</sub> O <sub>5</sub> S                | 453.87         | 90.9       |

**Table S2** Mass spectrometry conditions of 9  $\beta$ -LAs

| $\beta$ -LAs | Retention<br>(min) | Precursor<br>(m/z) | Declustering<br>potential (V) | Product ion (m/z) | Collision (eV) |
|--------------|--------------------|--------------------|-------------------------------|-------------------|----------------|
| CRA          | 1.77               | 613.1              | 130.1/129.9                   | 257.3*/285.1      | 37.7/25.3      |
| CFP          | 2.48               | 646.3              | 136.04/189.9                  | 290.3*/142.9      | 30.8/43.1      |
| EFT          | 3.16               | 524.1              | 112.0/120.0                   | 241.0*/210.1      | 24.6/30.3      |
| CPD          | 5.61               | 558.2              | 105.1/77.9                    | 410.1*/428.1      | 22.8/22.2      |
| CETP         | 5.65               | 512.2              | 95.9/109.9                    | 241.1*/398.1      | 24.2/27.2      |
| DIC          | 6.55               | 470.2              | 144.9/136.1                   | 159.9*/311.2      | 17.1/19.2      |
| CLO          | 6.17               | 436.2              | 132.0/140.0                   | 277.2*/159.7      | 19.0/18.0      |
| OXA          | 5.28               | 402.3              | 101.9/126.1                   | 160.1*/243.1      | 18.9/19.0      |
| FLU          | 6.35               | 454.0              | 123.0/123.2                   | 160.0*/295.2      | 16.4/22.8      |

**Table S3** The spiked recoveries and RSDs of 9  $\beta$ -LAs at three levels in the water and milk samples

| Analytes | Water                                                    |              |         | Milk                                                     |              |         |
|----------|----------------------------------------------------------|--------------|---------|----------------------------------------------------------|--------------|---------|
|          | Spiked concentration ( $\mu\text{g}\cdot\text{L}^{-1}$ ) | Recovery (%) | RSD (%) | Spiked concentration ( $\mu\text{g}\cdot\text{L}^{-1}$ ) | Recovery (%) | RSD (%) |
| CRA      | 0.4                                                      | 82.2         | 7.07    | 16                                                       | 74.1         | 6.49    |
|          | 1.6                                                      | 80.2         | 5.08    | 40                                                       | 77.0         | 4.00    |
|          | 4                                                        | 92.3         | 2.56    | 200                                                      | 71.9         | 2.76    |
| CFP      | 0.4                                                      | 95.3         | 7.37    | 16                                                       | 95.7         | 8.80    |
|          | 1.6                                                      | 78.2         | 9.18    | 40                                                       | 79.9         | 8.44    |
|          | 4                                                        | 79.4         | 6.29    | 200                                                      | 71.7         | 3.12    |
| EFT      | 0.4                                                      | 85.3         | 7.74    | 16                                                       | 82.6         | 2.60    |
|          | 1.6                                                      | 89.9         | 3.42    | 40                                                       | 73.8         | 2.15    |
|          | 4                                                        | 100.5        | 4.11    | 200                                                      | 74.8         | 2.81    |
| CPD      | 0.4                                                      | 82.9         | 5.35    | 16                                                       | 79.4         | 4.40    |
|          | 1.6                                                      | 79.0         | 1.14    | 40                                                       | 82.8         | 1.57    |
|          | 4                                                        | 93.7         | 2.14    | 200                                                      | 72.1         | 1.54    |
| CETP     | 0.4                                                      | 88.8         | 3.96    | 16                                                       | 79.6         | 3.47    |
|          | 1.6                                                      | 84.6         | 2.02    | 40                                                       | 87.9         | 2.18    |
|          | 4                                                        | 95.7         | 2.41    | 200                                                      | 77.1         | 1.71    |
| DIC      | 0.4                                                      | 114.6        | 2.93    | 16                                                       | 113.7        | 7.39    |
|          | 1.6                                                      | 116.6        | 1.89    | 40                                                       | 96.8         | 4.07    |
|          | 4                                                        | 116.1        | 5.39    | 200                                                      | 89.0         | 5.62    |
| CLO      | 0.4                                                      | 99.2         | 2.88    | 16                                                       | 79.2         | 7.89    |
|          | 1.6                                                      | 94.2         | 7.18    | 40                                                       | 95.7         | 9.46    |
|          | 4                                                        | 112.7        | 6.64    | 200                                                      | 96.7         | 5.92    |
| OXA      | 0.4                                                      | 112.9        | 2.64    | 16                                                       | 118.8        | 2.39    |
|          | 1.6                                                      | 118.1        | 2.80    | 40                                                       | 109.9        | 2.21    |
|          | 4                                                        | 117.7        | 4.32    | 200                                                      | 94.9         | 3.13    |
| FLU      | 0.4                                                      | 102.2        | 4.92    | 16                                                       | 105.0        | 2.14    |
|          | 1.6                                                      | 116.9        | 1.93    | 40                                                       | 93.5         | 1.87    |
|          | 4                                                        | 117.4        | 2.20    | 200                                                      | 82.8         | 3.42    |

**Table S4** Adsorption of different types of antibiotics with Fe<sub>3</sub>O<sub>4</sub>@SiO<sub>2</sub>@Ap-COF

| Type                 | Compounds                     | Adsorption efficiency (%) |
|----------------------|-------------------------------|---------------------------|
| NMZs <sup>a</sup>    | Tinidazole                    | 28.39                     |
|                      | 4-Nitroimidazole              | 5.23                      |
|                      | Hydroxymetronidazole          | 12.09                     |
|                      | 2-Methyl-4-nitroimidazole     | 15.38                     |
|                      | Pymetrozine-hydroxymethyl     | 8.98                      |
|                      | Metronidazole                 | 8.55                      |
|                      | Ronidazole                    | 25.32                     |
|                      | 1,2-Dimethyl-5-nitroimidazole | 18.29                     |
|                      | Secnidazole                   | 4.22                      |
|                      | Ornidazole                    | 26.72                     |
|                      | Ipronidazole                  | 6.95                      |
|                      | Hydroxy Ipronidazole          | 26.88                     |
|                      | TCs <sup>b</sup>              | 4-Epitetracycline         |
| Oxytetracycline      |                               | 15.69                     |
| 4-Epioxytetracycline |                               | 12.33                     |
| Tetracycline         |                               | 20.58                     |
|                      | 4-Epichlortetracycline        | 16.83                     |

<sup>a</sup>NMZs: nitroimidazoles. TCs<sup>b</sup>: tetracyclines.
